# Supplementary material
Source: PubMed Central journal article supplement (PMC3233392)
Supplement: supp_215.1.124_JEB060889FigS4.pdf [file supp_215.1.124_JEB060889FigS4.pdf]

## Material, Methods and Results for Figure S4

Six newly emerged bees and six mature foragers (returning from the field) were randomly collected from each of two high colonies and two low colonies. The brain was dissected and flashed-frozen in liquid nitrogen and stored at  $-80^{\circ}\text{C}$ . The same protocols were used for RNA extraction and qRT-PCR as those used for the ovary samples. Student t-test was performed on the log-transformed relative expression data. The newly emerged bee from High strain have higher transcripts of *TYR* in the brain than the Low strain newly emerged bee (Student t-test,  $t(1,22) = 2.708$ ,  $p = 0.0128$ ). There is no difference in transcripts of *TYR* in the brain of foragers from High and Low strains ( $p > 0.05$ ).

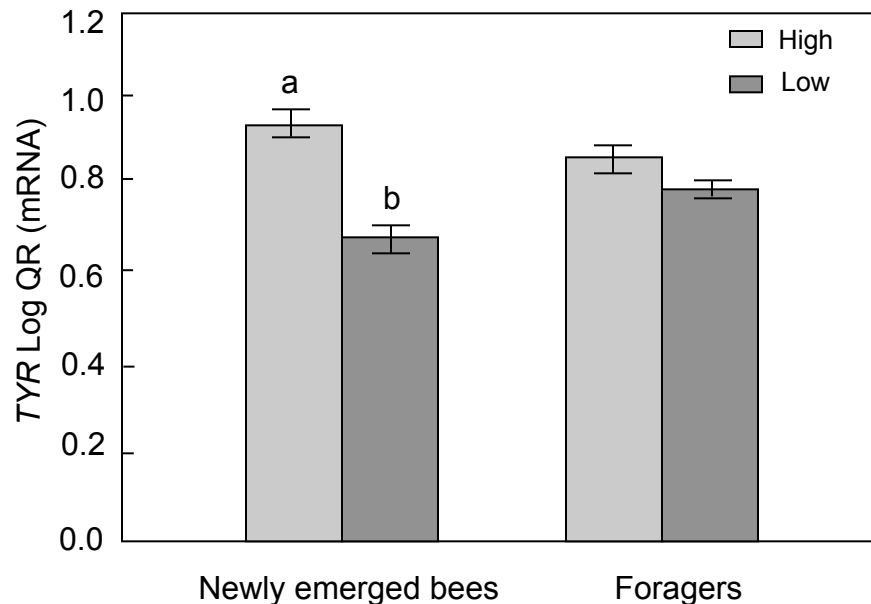

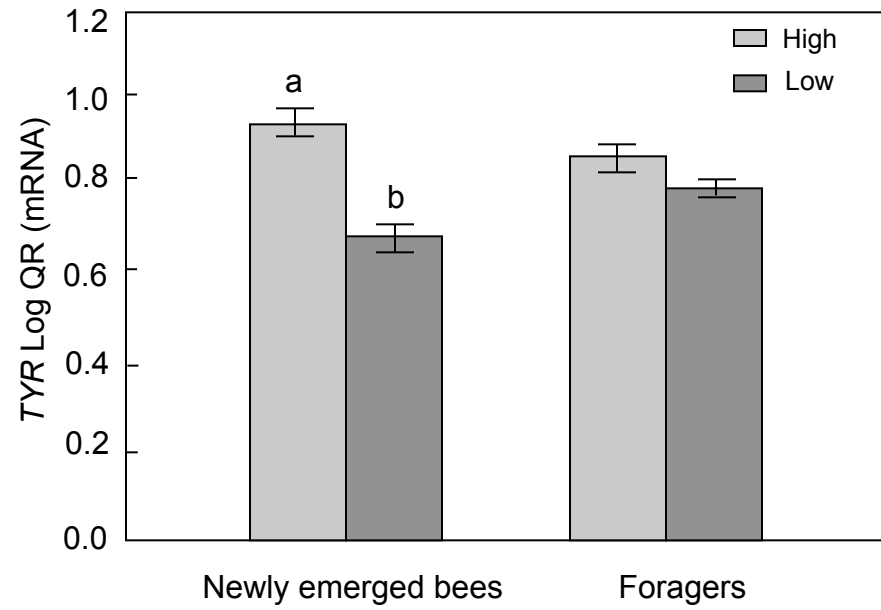

**Figure S4**
