# Supplementary material
Source: PubMed Central journal article supplement (PMC3233392)
Supplement: supp_215.1.124_JEB060889TablesS1.pdf [file supp_215.1.124_JEB060889TablesS1.pdf]

Table S1. Primer sequences of candidate genes

| Gene (gene ID)              | Forward primer        | Reverse primer       |
|-----------------------------|-----------------------|----------------------|
| <i>HR46</i> (GB10650)       | AGGTCGAGGACGAAGTTAGG  | ATACCCGCCATTGAAAGGAT |
| <i>Ftz-f1</i> (GB16873)     | ATGTCGCCGTTCCATTTAAG  | GCGAAGAACCGTATTGTGGT |
| <i>JHi-26</i> (GB19754)     | TCGATGACGTACGCTACGAG  | GTGTCCTTGGCATTGAGTT  |
| <i>TYR</i> (GB17911)        | GTTCGTCGTATGCTGGTTGC  | GTAGATGAGCGGGTTGAGGG |
| <i>MRJP1</i> (NM_001011579) | CCACACGTGCCTATATTCGAT | TTCGTTTACATTGCGGTTCA |
| <i>Actin</i> (XM_623378)    | TGCCAACACTGTCCTTTCTG  | AGAATTGACCCACCAATCCA |
