# Supplementary material
Source: PubMed Central journal article supplement (PMC3233392)
Supplement: supp_215.1.124_JEB060889TablesS3.pdf [file supp_215.1.124_JEB060889TablesS3.pdf]

Table S3. Comparison of gene ontology (GO) terms in the differentially regulated genes between High and Low strains

| Strain | Biological process               | <i>P</i> | Molecular function         | <i>P</i> | Cellular component  | <i>P</i> |
|--------|----------------------------------|----------|----------------------------|----------|---------------------|----------|
| Low    | Defense response                 | 0.0335   | Molecular function         | 0.0773   | Cytoskeleton        | 0.0510   |
|        | Regulation of apoptosis          | 0.0408   | G-protein receptor binding | 0.0673   |                     |          |
|        | Detection of abiotic stimulus    | 0.0102   |                            |          |                     |          |
|        | Electron transport               | 0.0408   |                            |          |                     |          |
|        | Signal transduction              | 0.0728   |                            |          |                     |          |
|        | Intracellular signaling cascade  | 0.0555   |                            |          |                     |          |
|        | Response to radiation            | 0.0564   |                            |          |                     |          |
|        | Catabolic process                | 0.0328   | Transferase activity       | 0.0469   | Endomembrane system | 0.0117   |
| High   | Protein modification development | 0.0669   | Kinase binding             | 0.0162   |                     |          |
|        | Nervous system development       | 0.0555   |                            |          |                     |          |
|        | Phosphate metabolic process      | 0.0831   |                            |          |                     |          |
|        | Membrane lipid metabolic process | 0.0701   |                            |          |                     |          |

The upregulated genes in High and Low ovaries were compared using GO analysis (<http://chem.colorado.edu/knightgroup/>) in terms of the three domains of GO – biological process, molecular function and cellular component. The cutoff *P*-value is 0.10. Results with *P*<0.05 are presented in Fig. 1.
