# Supplementary material
Source: PubMed Central journal article supplement (PMC3233392)

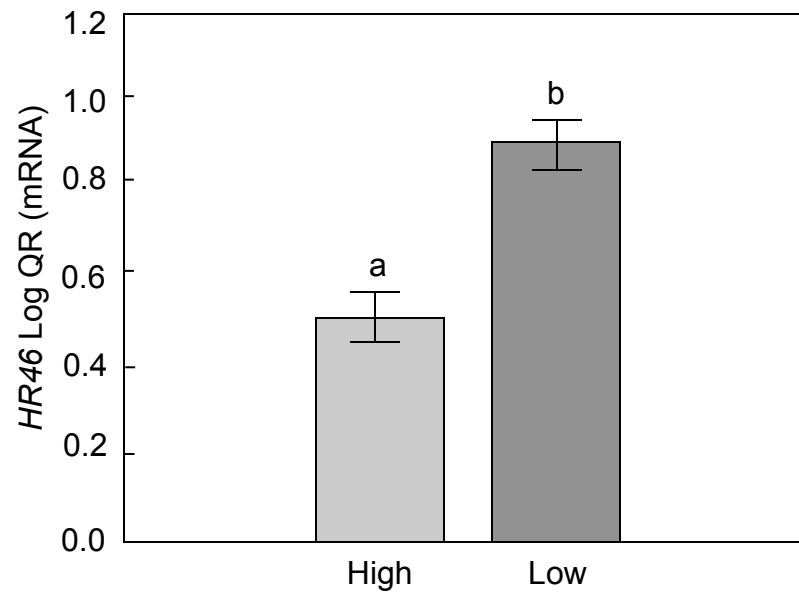

**Figure S1**

Supplement: supp_215.1.124_JEB060889FigS1.pdf [file supp_215.1.124_JEB060889FigS1.pdf]

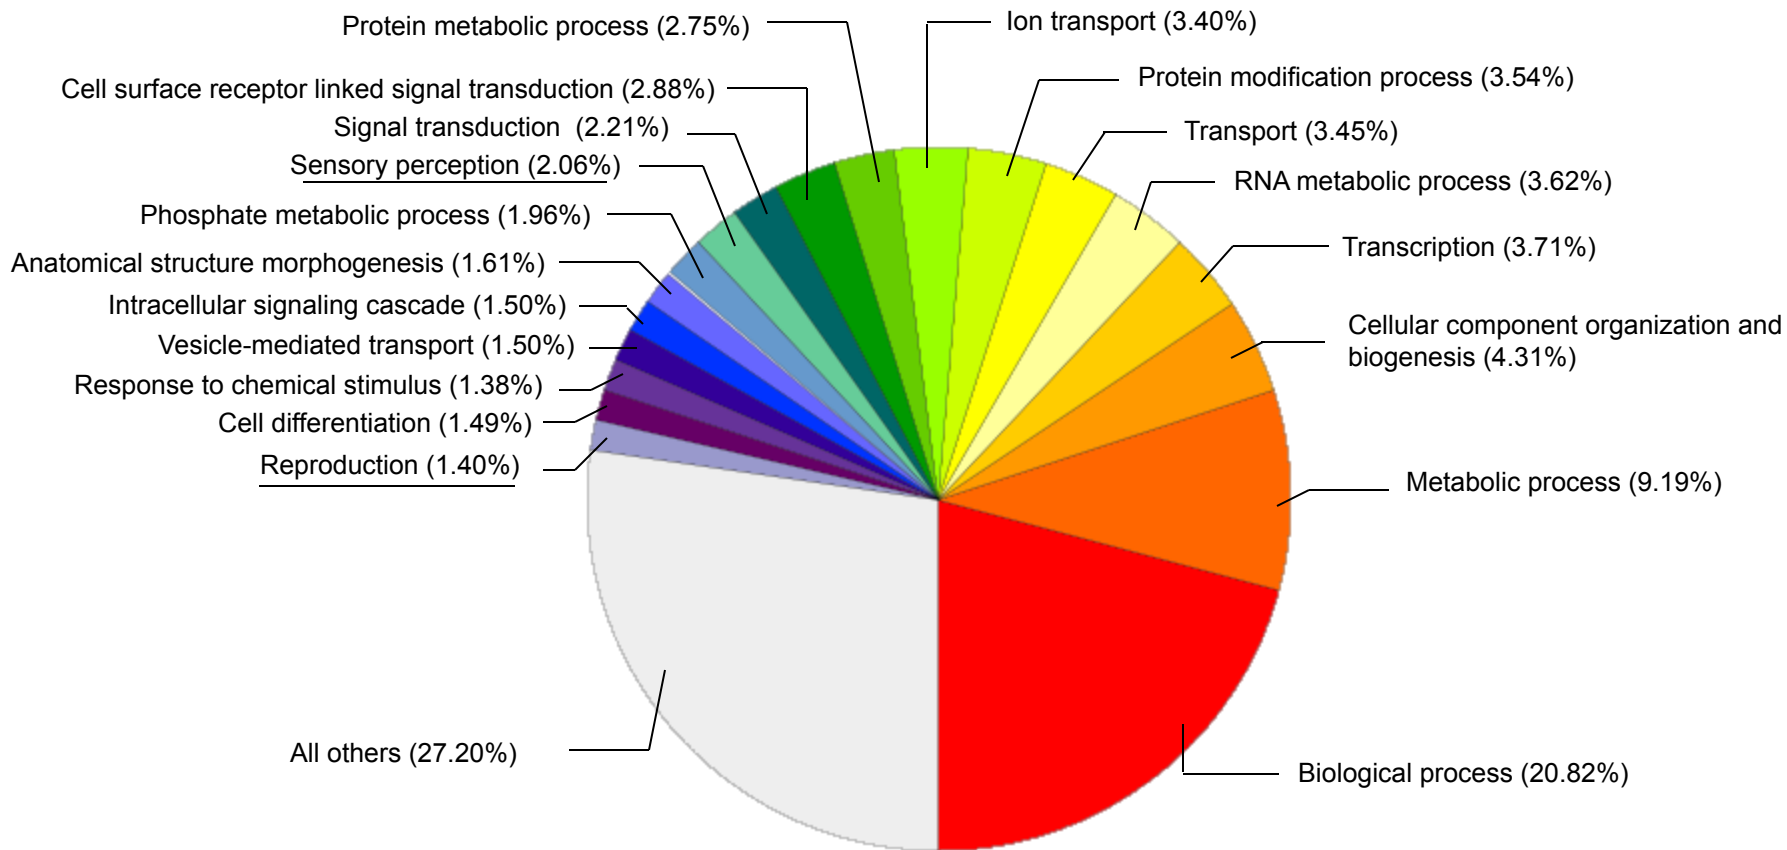

**Figure S2**

Supplement: supp_215.1.124_JEB060889FigS2.pdf [file supp_215.1.124_JEB060889FigS2.pdf]

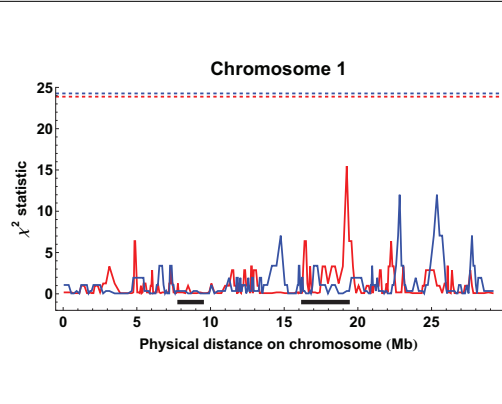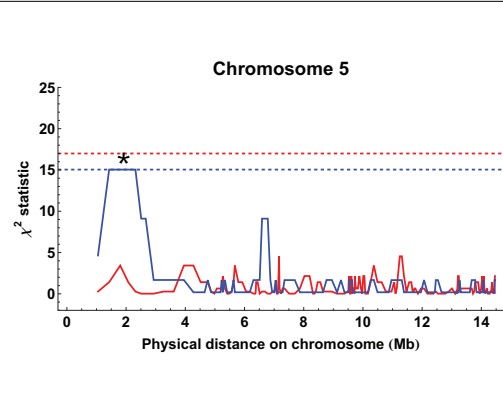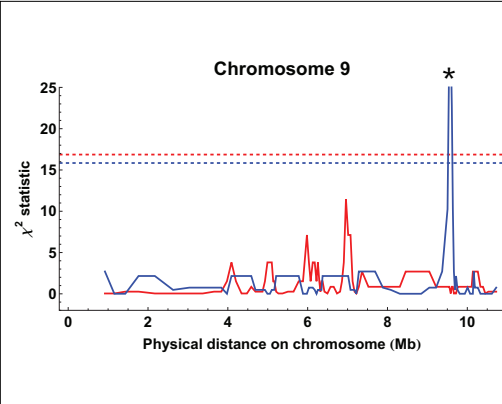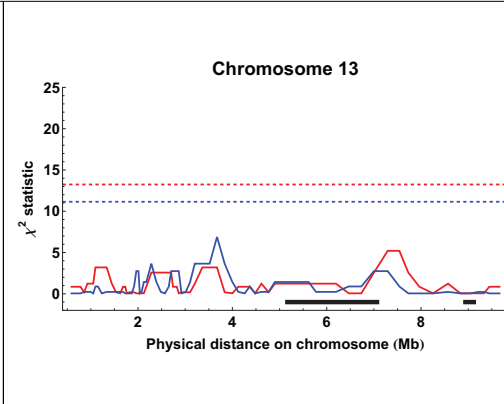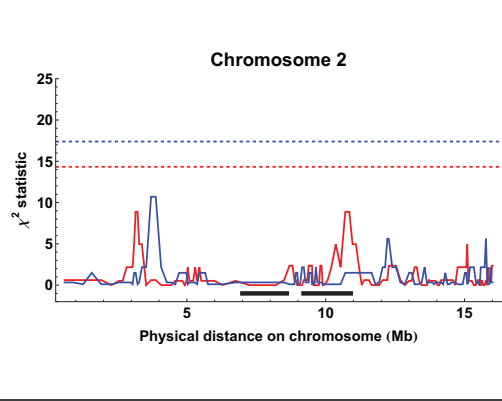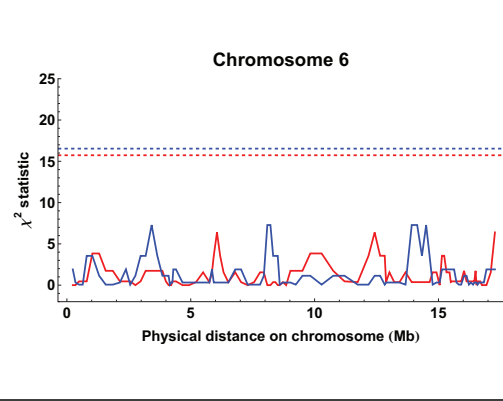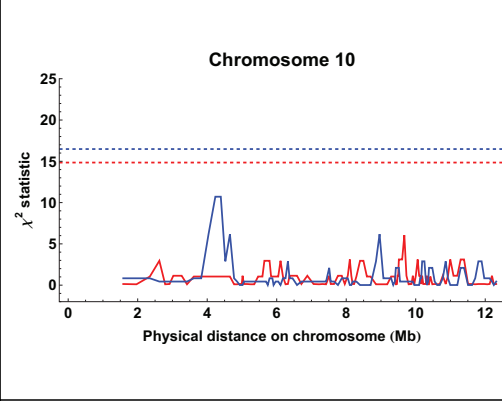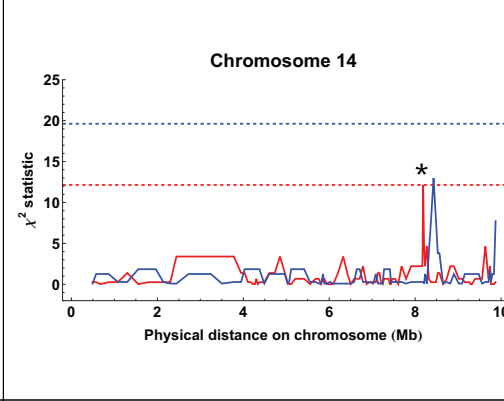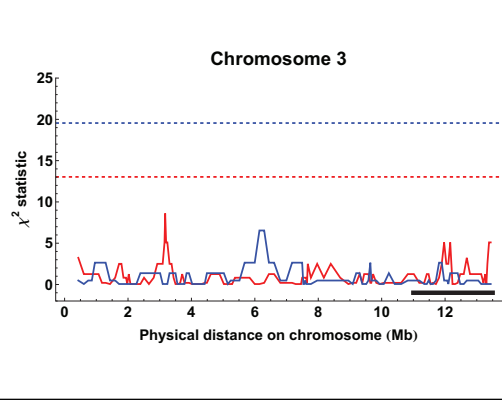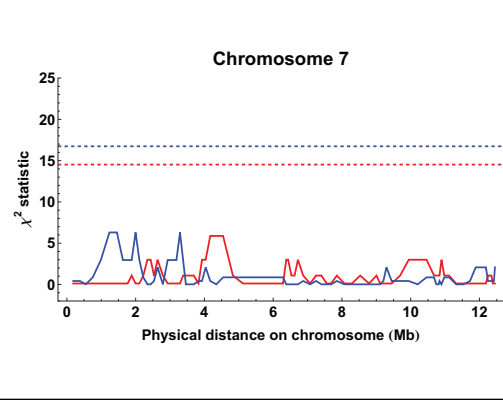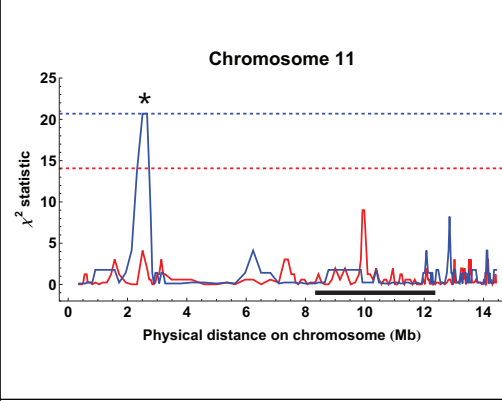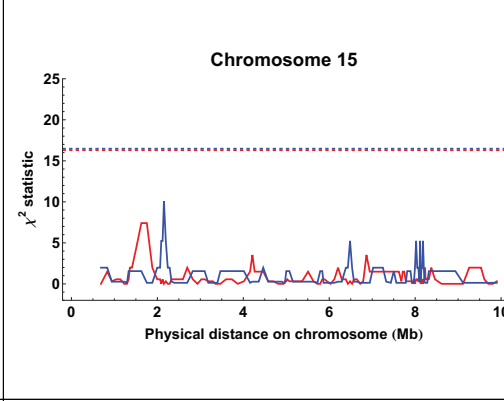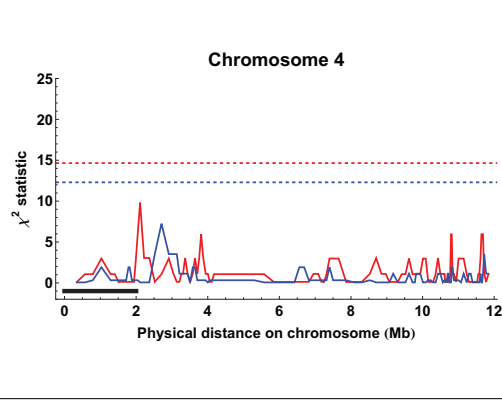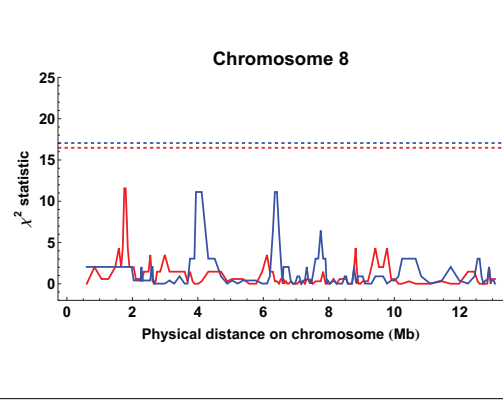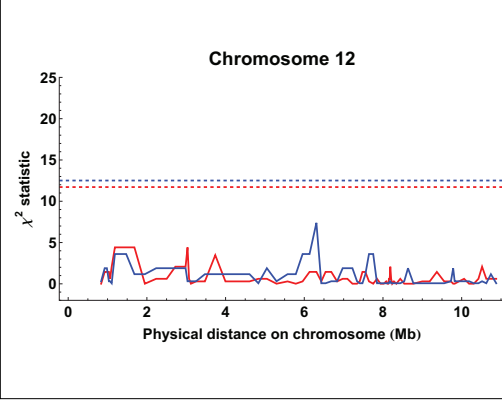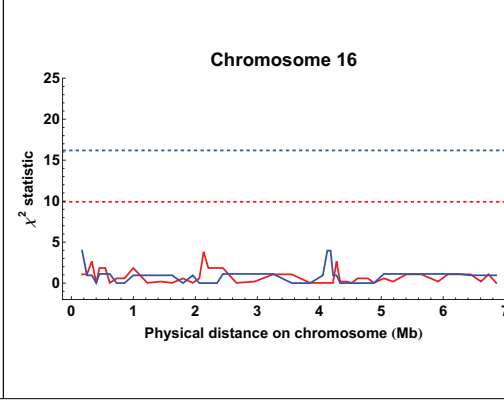

Supplement: supp_215.1.124_JEB060889FigS3.pdf [file supp_215.1.124_JEB060889FigS3.pdf]
